# Supplementary material for: Graphene field-effect transistors as bioanalytical sensors: design, operation and performance
Source: Royal Society of Chemistry journal article supplement (doi:10.1039/d0an01661f), 2020-11-19
Supplement: d0an01661f1.pdf [file d0an01661f1.pdf]

# Supplementary material

## Graphene field-effect transistors as bioanalytical sensors: design, operation and performance

Anouk Béraud,<sup>a,b</sup> Madline Sauvage,<sup>a,c</sup> Claudia M. Bazán,<sup>a</sup> Monique Tie,<sup>a,d</sup> Amira Bencherif,<sup>a,e</sup>  
and Delphine Bouilly<sup>\*a,b</sup>

### 1 Literature survey

We surveyed the literature for studies on GFETs applied as bioanalytical sensors. Specifically, we selected experimental studies conducted with GFETs to detect biologically-relevant analytes, such as proteins, DNA, small molecules, ions, bacterias, viruses. We collected 85 papers fitting this criteria. For each paper, we extracted a wide range of parameters covering design, operation and performance specifications. We used “n/a” when the attribute was not applicable, and “not found” when we could not find the information in the paper. The complete database of these papers is provided online here: [http://bit.ly/Beraud2020\\_bioGFETdatabase](http://bit.ly/Beraud2020_bioGFETdatabase).

### 2 Analysis of reported LODs

The analysis of reported limits of detection (LoDs) was done on papers from the above collection that presented the following two criteria:

- Limit of detection (LOD) explicitly stated in the paper;
- Analyte concentrations expressed in molar unit (M) or conversion possible with the information provided in the paper.

With these constraints, we collected 61 papers providing the following data:

- 20 data points from 17 papers on protein detection (Table S1),
- 14 data points from 12 papers on ions detection (Table S2),
- 10 data points from 10 papers on the detection of various small molecules (Table S3),
- 23 data points from 22 papers on DNA detection (Table S4).

For these four sets, we tabulated below the nature of the analyte, the type of graphene used, and the LOD as it is reported in the paper. In the case of DNA detection, we also report the length of the target DNA sequence. When necessary, we also report the molecular weight of the analyte used to convert the LOD in molar unit. All reference numbers are the same as in the main article.

We draw attention on two considerations:

1. The LODs were transcribed as reported in the original articles. Consequently, the tabulated data aggregates LODs calculated with various techniques, without validation or calibration of the methods used by the authors of the studies.
2. Graphene type is presented here as a proxy for graphene quality (as discussed in the main article). Mobility values were not directly used because they were not reported in enough papers, and because reported values often include contributions external to the quality of graphene itself, such as from the contacts.

---

<sup>a</sup> Institute for Research in Immunology and Cancer (IRIC), Université de Montréal, Montréal, Canada. <sup>b</sup> Department of Physics, Faculty of Arts and Sciences, Université de Montréal, Montréal, Canada. <sup>c</sup> Program of Molecular Biology, Faculty of Medicine, Université de Montréal, Montréal, Canada. <sup>d</sup> Department of Chemistry, Faculty of Arts and Sciences, Université de Montréal, Montréal, Canada. <sup>e</sup> Institute for Biomedical Engineering, Faculty of Medicine, Université de Montréal, Montréal, Canada.

\*E-mail: [delphine.bouilly@umontreal.ca](mailto:delphine.bouilly@umontreal.ca)

| Graphene type | Analyte                  | Molecular weight | Reported LOD          | LOD in M              | Citation |
|---------------|--------------------------|------------------|-----------------------|-----------------------|----------|
| rGO           | Protective Antigen       |                  | 1.2aM                 | $1.2 \times 10^{-18}$ | 146      |
| rGO           | PSA-ACT                  |                  | 1.1 fM                | $1.1 \times 10^{-15}$ | 41       |
| rGO           | BNP                      |                  | 100 fM                | $1 \times 10^{-13}$   | 174      |
| rGO           | IgG                      | 150 kDa          | 1 ng/mL               | $6.7 \times 10^{-12}$ | 147      |
| rGO           | IgE                      |                  | 43.2pM                | $4.3 \times 10^{-11}$ | 196      |
| CVD           | SARS-CoV-2 spike protein | 90kDa            | 1fg/mL                | $1.1 \times 10^{-17}$ | 136      |
| CVD           | TSH                      |                  | $0.2 \times 10^{-15}$ | $2 \times 10^{-16}$   | 190      |
| CVD           | Ferritin                 |                  | 10fM                  | $1 \times 10^{-14}$   | 116      |
| CVD           | HcG                      | 36.7 kDa         | 1 pg/mL               | $2.7 \times 10^{-14}$ | 89       |
| CVD           | IL-6                     |                  | 618 fM                | $6.2 \times 10^{-13}$ | 139      |
| CVD           | Insulin                  |                  | 766 fM                | $7.6 \times 10^{-13}$ | 139      |
| CVD           | AFP                      | 70 kDa           | 0.1 ng/mL             | $1.4 \times 10^{-12}$ | 115      |
| CVD           | Thrombin                 |                  | 2.6pM                 | $2.6 \times 10^{-12}$ | 62       |
| CVD           | Poly-l-lysine            |                  | 11 pM                 | $1.1 \times 10^{-11}$ | 132      |
| CVD           | Insulin                  |                  | 35 pM                 | $3.5 \times 10^{-11}$ | 189      |
| CVD           | IFN- $\gamma$            |                  | 83 pM                 | $8.3 \times 10^{-11}$ | 102      |
| ME            | cTn1                     | 23.9 kDa         | 10 fg/mL              | $4.2 \times 10^{-16}$ | 117      |
| ME            | CCP                      | 10 kDa           | 10 fg/mL              | $1 \times 10^{-15}$   | 117      |
| ME            | p24                      | 24 kDa           | 100 fg/mL             | $4.2 \times 10^{-15}$ | 117      |
| ME            | HSP                      |                  | 100 pM                | $1 \times 10^{-10}$   | 88       |

Table S1: Reported data in GFET studies on protein detection (20 data points from 17 papers)

| Graphene type | Analyte                        | Molecular weight | Reported LOD | LOD in M              | Citation |
|---------------|--------------------------------|------------------|--------------|-----------------------|----------|
| rGO           | Hg <sup>2+</sup>               |                  | 1 nM         | $1 \times 10^{-9}$    | 118      |
| rGO           | Hg <sup>2+</sup>               |                  | 1 nM         | $1 \times 10^{-9}$    | 38       |
| rGO           | Pb <sup>2+</sup>               |                  | 10 nM        | $1 \times 10^{-8}$    | 120      |
| rGO           | HPO <sub>4</sub> <sup>2-</sup> |                  | 26 nM        | $2.6 \times 10^{-8}$  | 200      |
| rGO           | Ca <sup>2+</sup>               |                  | 1 $\mu$ M    | $1 \times 10^{-6}$    | 38       |
| CVD           | K <sup>+</sup>                 |                  | 0.058pM      | $5.8 \times 10^{-14}$ | 157      |
| CVD           | Hg <sup>2+</sup>               |                  | 10 pM        | $1 \times 10^{-11}$   | 123      |
| CVD           | Hg <sup>2+</sup>               |                  | 40 pM        | $4 \times 10^{-11}$   | 122      |
| CVD           | Pb <sup>2+</sup>               | 207 g/mol        | 163.7 ng/L   | $7.9 \times 10^{-10}$ | 39       |
| CVD           | K <sup>+</sup>                 |                  | 1nM          | $1 \times 10^{-9}$    | 119      |
| CVD           | Pb <sup>2+</sup>               |                  | 2 $\mu$ M    | $2 \times 10^{-6}$    | 158      |
| CVD           | K <sup>+</sup>                 |                  | 27 $\mu$ M   | $2.7 \times 10^{-5}$  | 158      |
| ME            | Pb <sup>2+</sup>               | 207 g/mol        | 37.5ng/L     | $1.8 \times 10^{-10}$ | 121      |
| ME            | Hg <sup>2+</sup>               | 200.58 g/mol     | 0.1ppb       | $5 \times 10^{-7}$    | 87       |

Table S2: Reported data in GFET studies on ion detection (14 data points from 12 papers)

| Graphene type | Analyte      | Molecular weight | Reported LOD | LOD in M              | Citation |
|---------------|--------------|------------------|--------------|-----------------------|----------|
| rGO           | Tobramycin   |                  | 0.3 nM       | $3 \times 10^{-10}$   | 50       |
| rGO           | ATP          |                  | 400nM        | $4 \times 10^{-7}$    | 106      |
| CVD           | Biotin       |                  | 0.37pM       | $3.7 \times 10^{-13}$ | 100      |
| CVD           | Nalodextrone | 341.401 g/mol    | 10 pg/mL     | $2.9 \times 10^{-11}$ | 49       |
| CVD           | OH radical   |                  | $10^{-9}$ M  | $1 \times 10^{-9}$    | 52       |
| CVD           | Glucose      |                  | 0.15 $\mu$ M | $1.5 \times 10^{-7}$  | 159      |
| CVD           | Glucose      |                  | 0.46 $\mu$ M | $4.6 \times 10^{-7}$  | 40       |
| CVD           | Glucose      |                  | 0.1 mM       | $1 \times 10^{-4}$    | 91       |
| ME            | Chlorpyrifos |                  | 1.8 fM       | $1.8 \times 10^{-15}$ | 56       |
| ME            | NO           |                  | 0.3 nM       | $3 \times 10^{-10}$   | 51       |

Table S3: Reported data in GFET studies on small molecules detection (10 data points from 10 papers)

| Graphene type | DNA length (mer) | LOD reported (M)      | Citation |
|---------------|------------------|-----------------------|----------|
| rGO           | 18               | $5 \times 10^{-12}$   | 60       |
| rGO           | 22               | $1 \times 10^{-13}$   | 43       |
| rGO           | 22               | $1 \times 10^{-14}$   | 161      |
| rGO           | 22               | $2.4 \times 10^{-9}$  | 107      |
| rGO           | 24               | $2 \times 10^{-9}$    | 134      |
| CVD           | 11               | $2 \times 10^{-12}$   | 129      |
| CVD           | 12               | $1 \times 10^{-12}$   | 104      |
| CVD           | 12               | $1 \times 10^{-11}$   | 105      |
| CVD           | 15               | $1 \times 10^{-13}$   | 83       |
| CVD           | 15               | $1 \times 10^{-17}$   | 162      |
| CVD           | 19               | $1 \times 10^{-9}$    | 108      |
| CVD           | 20               | $1 \times 10^{-11}$   | 53       |
| CVD           | 20               | $3 \times 10^{-9}$    | 135      |
| CVD           | 20               | $1 \times 10^{-13}$   | 63       |
| CVD           | 21               | $5 \times 10^{-15}$   | 57       |
| CVD           | 22               | $6 \times 10^{-19}$   | 59       |
| CVD           | 22               | $2 \times 10^{-17}$   | 59       |
| CVD           | 22               | $1 \times 10^{-14}$   | 125      |
| CVD           | 25               | $2.5 \times 10^{-17}$ | 81       |
| CVD           | 30               | $1 \times 10^{-9}$    | 109      |
| CVD           | 39               | $8 \times 10^{-21}$   | 124      |
| CVD           | 60               | $1 \times 10^{-15}$   | 65       |
| CVD           | 80               | $1 \times 10^{-18}$   | 58       |

Table S4: Reported data in GFET studies on DNA hybridization detection (23 data points from 22 papers)
